# Supplementary material
Source: MDPI journal article supplement (https://www.mdpi.com/1999-4907/15/2/353)
Supplement: s1 [file s1]

**Table S1.** Concentrations of nitrogen (N), carbon (C),  $^{13}\text{C}$  and  $^{15}\text{N}$ , and C:N ratio in humic acid-like substances (HA), fulvic acid-like substances (FS), non-extractable organic matter (NEOM) and particulate organic matter (POM) for organic (O; Oe and Oa horizons), organo-mineral (A; A horizons) and mineral (ENDO; AB, Bw, BC, C and C<sub>R</sub> horizons) layers.

|                          |      | N<br>% | C<br>%  | $^{13}\text{C}$<br>‰ | $^{15}\text{N}$<br>‰ | C:N    |
|--------------------------|------|--------|---------|----------------------|----------------------|--------|
| Humic Distrudepts        |      |        |         |                      |                      |        |
| O                        | POM  | 1.086  | 27.683  | -28.191              | -2.560               | 25.480 |
|                          | HA   | 1.087  | 14.682  | -27.304              | -1.346               | 13.507 |
|                          | FS   | 0.494  | 6.937   | -25.217              | -0.829               | 14.039 |
|                          | NEOM | 11.827 | 287.701 | -27.797              | -2.709               | 24.325 |
| A                        | POM  | 0.089  | 1.908   | -27.840              | -0.786               | 21.418 |
|                          | HA   | 0.981  | 12.465  | -27.034              | -0.675               | 12.711 |
|                          | FS   | 0.543  | 7.399   | -25.295              | -0.352               | 13.619 |
|                          | NEOM | 4.077  | 113.334 | -27.811              | -0.047               | 27.796 |
| ENDO                     | POM  | 0.006  | 0.285   | -27.424              | 0.273                | 47.499 |
|                          | HA   | 0.271  | 2.918   | -25.467              | 4.991                | 10.778 |
|                          | FS   | 0.255  | 5.546   | -25.242              | 3.350                | 21.715 |
|                          | NEOM | 1.091  | 20.581  | -26.279              | 5.308                | 18.872 |
| Humic Lithic Distrudepts |      |        |         |                      |                      |        |
| O                        | POM  | 1.220  | 30.647  | -27.480              | -1.267               | 25.112 |
|                          | HA   | 0.490  | 6.490   | -26.779              | -0.625               | 13.254 |
|                          | FS   | 0.178  | 2.676   | -24.542              | -0.416               | 15.032 |
|                          | NEOM | 15.880 | 359.759 | -27.142              | -2.282               | 22.655 |
| A                        | POM  | 0.057  | 1.811   | -28.132              | -2.296               | 31.500 |
|                          | HA   | 0.646  | 7.883   | -27.400              | -1.514               | 12.204 |
|                          | FS   | 0.739  | 7.144   | -25.823              | -0.879               | 9.666  |
|                          | NEOM | 2.726  | 68.981  | -27.739              | -1.867               | 25.306 |
| ENDO                     | POM  | 0.018  | 0.871   | -28.514              | 2.443                | 48.934 |
|                          | HA   | 0.235  | 2.822   | -26.185              | 4.034                | 11.999 |
|                          | FS   | 0.163  | 3.734   | -25.970              | 1.948                | 22.960 |
|                          | NEOM | 0.704  | 23.740  | -27.281              | 3.676                | 33.725 |
| Typic Distrudepts        |      |        |         |                      |                      |        |
| O                        | POM  | 1.750  | 43.672  | -28.473              | -3.381               | 24.951 |
|                          | HA   | 0.541  | 6.838   | -28.561              | -2.552               | 12.633 |
|                          | FS   | 0.146  | 4.735   | -25.704              | 2.699                | 32.529 |
|                          | NEOM | 8.799  | 239.689 | -28.763              | -2.949               | 27.240 |
| A                        | POM  | 0.152  | 4.339   | -28.445              | -1.777               | 28.583 |
|                          | HA   | 0.803  | 9.612   | -27.190              | -0.036               | 11.977 |
|                          | FS   | 0.350  | 5.812   | -26.102              | 0.314                | 16.603 |
|                          | NEOM | 2.409  | 63.524  | -27.696              | -0.406               | 26.370 |
| ENDO                     | POM  | 0.007  | 0.408   | -28.040              | 0.347                | 61.344 |
|                          | HA   | 0.169  | 1.780   | -25.434              | 5.148                | 10.547 |
|                          | FS   | 0.155  | 3.130   | -25.224              | 4.436                | 20.159 |
|                          | NEOM | 0.455  | 11.985  | -26.862              | 4.189                | 26.333 |
